# Supplementary material for: The WRF-CMAQ Simulation of a Complex Pollution Episode with High-Level O3 and PM2.5 over the North China Plain: Pollution Characteristics and Causes
Source: MDPI journal article supplement (doi:10.3390/atmos15020198), 2024-02-04
Supplement: s1 [file s1]

# Supplementary Materials: The WRF-CMAQ Simulation of a Complex Pollution Episode with High-level O<sub>3</sub> and PM<sub>2.5</sub> over the North China Plain: Pollution Characteristics and Causes

Xuedan Dou <sup>1</sup>, Shaocai Yu <sup>2,\*</sup>, Jiali Li <sup>1</sup>, Yuhai Sun<sup>2</sup>, Zhe Song <sup>1</sup>, Ningning Yao<sup>2</sup> and Pengfei Li <sup>3,\*</sup>

## S1. Calculation Formula of the Statistical Metrics

The modeling results were compared with the observational data to evaluate the WRF-CMAQ simulation performances. Table S1 presents the statistical metrics, including mean bias (MB), mean error (ME), root mean square error (RMSE), and the index of agreement (IOA) for T2, RH2, WS10, and WD10 in Handan, Jining, Anyang, and Kaifeng. Additionally, normalized mean bias (NMB), normalized mean error (NME), and the Pearson's correlation coefficient (R) were added to assess the PM<sub>2.5</sub> and O<sub>3</sub> simulations as shown in Table S2. The definitions of these statistical metrics are as follows:

$$MB = \overline{M} - \overline{O} \quad (S1)$$

$$ME = \frac{\sum_{i=1}^N |M_i - O_i|}{N} \quad (S2)$$

$$RMSE = \sqrt{\frac{\sum_{i=1}^N (M_i - O_i)^2}{N}} \quad (S3)$$

$$IOA = 1 - \frac{N \times RMSE^2}{\sum_{i=1}^N (|O_i - \overline{O}| + |M_i - \overline{O}|)^2} \quad (S4)$$

$$NMB = \frac{\overline{M}}{\overline{O}} - 1 \quad (S5)$$

$$NME = \frac{\sum_{i=1}^N |M_i - O_i|}{\sum_{i=1}^N O_i} \quad (S6)$$

$$R = \frac{\sum_{i=1}^N (M_i - \overline{M})(O_i - \overline{O})}{\sqrt{\sum_{i=1}^N (M_i - \overline{M})^2 \times \sum_{i=1}^N (O_i - \overline{O})^2}} \quad (S7)$$

where  $\overline{M}$  and  $\overline{O}$  are mean model-predicted and observed values, respectively.  $M_i$  and  $O_i$  are model-predicted and observed values, respectively, and  $N$  is the number of samples.

**Table S1.** Performance statistics of 2 m temperature (T2), 2 m relative humidity (RH2), 10 m wind speed (WS10), and 10 m wind direction (WD10) in the 4 cities from 00:00 LT March 30 to 00:00 LT April 10, 2019. Mean observations (Obs), mean simulations (Sim), MB, ME, RMSE, and IOA are given. Observation frequency is 3 hourly.

| Meteorological elements | City    | Obs    | Sim    | MB     | ME     | RMSE   | IOA  |
|-------------------------|---------|--------|--------|--------|--------|--------|------|
| T2 (°C)                 | Anyang  | 13.70  | 13.65  | -0.06  | 1.61   | 2.19   | 0.95 |
|                         | Handan  | 13.47  | 13.01  | -0.46  | 1.60   | 2.18   | 0.95 |
|                         | Jining  | 13.24  | 13.63  | 0.39   | 1.45   | 1.88   | 0.96 |
|                         | Kaifeng | 14.96  | 14.67  | -0.29  | 1.11   | 1.40   | 0.98 |
| RH2 (%)                 | Anyang  | 45.13  | 49.31  | 4.19   | 8.50   | 12.24  | 0.92 |
|                         | Handan  | 44.31  | 46.02  | 1.72   | 8.16   | 11.54  | 0.93 |
|                         | Jining  | 56.36  | 58.94  | 2.58   | 11.02  | 14.80  | 0.87 |
|                         | Kaifeng | 52.90  | 54.86  | 1.96   | 10.80  | 15.56  | 0.87 |
| WS10 (m/s)              | Anyang  | 3.52   | 4.19   | 0.67   | 1.78   | 2.14   | 0.73 |
|                         | Handan  | 4.49   | 3.76   | -0.73  | 1.84   | 2.36   | 0.71 |
|                         | Jining  | 2.22   | 3.92   | 1.70   | 1.93   | 2.32   | 0.53 |
|                         | Kaifeng | 2.84   | 3.68   | 0.84   | 1.38   | 1.78   | 0.80 |
| WD (°)                  | Anyang  | 189.85 | 170.59 | -19.26 | 104.71 | 148.07 | 0.52 |
|                         | Handan  | 207.89 | 180.64 | -27.26 | 105.97 | 152.23 | 0.55 |
|                         | Jining  | 192.58 | 173.49 | -19.09 | 75.66  | 121.01 | 0.62 |
|                         | Kaifeng | 144.16 | 121.79 | -22.37 | 45.72  | 87.99  | 0.79 |

**Table S2.** Performance statistics of PM<sub>2.5</sub> and O<sub>3</sub> in the 4 cities from 00:00 LT March 30 to 00:00 LT April 10, 2019. Obs, Sim, MB, ME, NMB, NME, and R are listed.

| Pollutants                             | City    | Obs   | Sim   | MB     | ME    | NMB    | NME   | R    |
|----------------------------------------|---------|-------|-------|--------|-------|--------|-------|------|
| O <sub>3</sub> (µg/m <sup>3</sup> )    | Anyang  | 76.58 | 68.31 | -8.27  | 23.64 | -10.8% | 30.9% | 0.77 |
|                                        | Handan  | 81.28 | 60.64 | -20.65 | 28.48 | -25.4% | 35.0% | 0.79 |
|                                        | Jining  | 86.45 | 78.40 | -8.05  | 26.84 | -9.3%  | 31.1% | 0.77 |
|                                        | Kaifeng | 86.68 | 87.83 | 1.15   | 19.83 | 1.3%   | 22.9% | 0.80 |
| PM <sub>2.5</sub> (µg/m <sup>3</sup> ) | Anyang  | 65.42 | 51.99 | -13.43 | 23.41 | -20.5% | 35.8% | 0.73 |
|                                        | Handan  | 56.64 | 50.58 | -6.07  | 15.96 | -10.7% | 28.2% | 0.74 |
|                                        | Jining  | 68.57 | 59.12 | -9.44  | 17.82 | -13.8% | 26.0% | 0.81 |
|                                        | Kaifeng | 61.48 | 58.92 | -2.56  | 21.64 | -4.2%  | 35.2% | 0.56 |
